# Supplementary material for: Molecular Phylogenetic Relationships, Trichothecene Chemotype Diversity and Aggressiveness of Strains in a Global Collection of Fusarium graminearum Species
Source: PubMed Central journal article supplement (PMC6563009; doi:10.3390/toxins11050263), 2019-05-11
Supplement: toxins-11-00263-s001.pdf [file toxins-11-00263-s001.pdf]

## Supplementary Materials

**Table S1.** Strain code, species, geographic origin, host and trichothecene chemotype of *Fusarium graminearum* species complex strains used in the study.

|          | Species                   | Geographic origin | Host  | Trichothecene chemotype |
|----------|---------------------------|-------------------|-------|-------------------------|
| CS7402   | <i>F. graminearum</i> s.s | Australia         | Wheat | 15-ADON                 |
| CS7300   | <i>F. graminearum</i> s.s | Australia         | Wheat | 15-ADON                 |
| CS7399   | <i>F. graminearum</i> s.s | Australia         | Wheat | 15-ADON                 |
| CS7403   | <i>F. graminearum</i> s.s | Australia         | Wheat | 15-ADON                 |
| CS7293   | <i>F. graminearum</i> s.s | Australia         | Wheat | 15-ADON                 |
| CS7295   | <i>F. graminearum</i> s.s | Australia         | Wheat | 15-ADON                 |
| CS7333   | <i>F. graminearum</i> s.s | Australia         | Wheat | 15-ADON                 |
| CS7340   | <i>F. graminearum</i> s.s | Australia         | Wheat | 15-ADON                 |
| CS7206   | <i>F. graminearum</i> s.s | Australia         | Wheat | 15-ADON                 |
| CS7404   | <i>F. graminearum</i> s.s | Australia         | Wheat | 15-ADON                 |
| CS7227   | <i>F. graminearum</i> s.s | Australia         | Wheat | 15-ADON                 |
| CS7214   | <i>F. graminearum</i> s.s | Australia         | Wheat | 15-ADON                 |
| CS7216   | <i>F. graminearum</i> s.s | Australia         | Wheat | 15-ADON                 |
| CS7345   | <i>F. graminearum</i> s.s | Australia         | Wheat | 15-ADON                 |
| CS7341   | <i>F. graminearum</i> s.s | Australia         | Wheat | 15-ADON                 |
| CS7357   | <i>F. graminearum</i> s.s | Australia         | Wheat | 15-ADON                 |
| CS3187   | <i>F. graminearum</i> s.s | Australia         | Wheat | 15-ADON                 |
| CS7339   | <i>F. graminearum</i> s.s | Australia         | Wheat | 15-ADON                 |
| CS7441   | <i>F. graminearum</i> s.s | Australia         | Wheat | 15-ADON                 |
| CS7220   | <i>F. meridionale</i>     | Australia         | Wheat | NIV                     |
| BR002    | <i>F. graminearum</i> s.s | Brazil            | Wheat | 15-ADON                 |
| BR004    | <i>F. graminearum</i> s.s | Brazil            | Wheat | 15-ADON                 |
| BR005    | <i>F. graminearum</i> s.s | Brazil            | Wheat | 15-ADON                 |
| BR008    | <i>F. graminearum</i> s.s | Brazil            | Wheat | 15-ADON                 |
| BR009    | <i>F. graminearum</i> s.s | Brazil            | Wheat | 15-ADON                 |
| BR011    | <i>F. graminearum</i> s.s | Brazil            | Wheat | 15-ADON                 |
| BR012    | <i>F. graminearum</i> s.s | Brazil            | Wheat | 15-ADON                 |
| BR014    | <i>F. graminearum</i> s.s | Brazil            | Wheat | 15-ADON                 |
| BR016    | <i>F. graminearum</i> s.s | Brazil            | Wheat | 15-ADON                 |
| BR017    | <i>F. graminearum</i> s.s | Brazil            | Wheat | 15-ADON                 |
| BR001    | <i>F.austroamericanum</i> | Brazil            | Wheat | NIV                     |
| BR003    | <i>F. cortaderiae</i>     | Brazil            | Wheat | NIV                     |
| BR006    | <i>F. cortaderiae</i>     | Brazil            | Wheat | NIV                     |
| BR007    | <i>F. meridionale</i>     | Brazil            | Wheat | NIV                     |
| BR013    | <i>F. meridionale</i>     | Brazil            | Wheat | NIV                     |
| NB0618   | <i>F. graminearum</i> s.s | Canada            | Wheat | 15-ADON                 |
| Q0622    | <i>F. graminearum</i> s.s | Canada            | Wheat | 15-ADON                 |
| DFFG109  | <i>F. graminearum</i> s.s | Canada            | Wheat | 15-ADON                 |
| DFFG144  | <i>F. graminearum</i> s.s | Canada            | Wheat | 15-ADON                 |
| DFFG102  | <i>F. graminearum</i> s.s | Canada            | Wheat | 15-ADON                 |
| S3AN0601 | <i>F. graminearum</i> s.s | Canada            | Wheat | 15-ADON                 |
| ON0617   | <i>F. graminearum</i> s.s | Canada            | Wheat | 15-ADON                 |
| DFFG30   | <i>F. graminearum</i> s.s | Canada            | Wheat | 15-ADON                 |
| ON0605   | <i>F. graminearum</i> s.s | Canada            | Wheat | 15-ADON                 |

|           |                           |         |       |         |
|-----------|---------------------------|---------|-------|---------|
| PEI0634   | <i>F. graminearum s.s</i> | Canada  | Wheat | 15-ADON |
| M50601    | <i>F. graminearum s.s</i> | Canada  | Wheat | 3-ADON  |
| M20601    | <i>F. graminearum s.s</i> | Canada  | Wheat | 3-ADON  |
| A20601    | <i>F. graminearum s.s</i> | Canada  | Wheat | 3-ADON  |
| NB0617    | <i>F. graminearum s.s</i> | Canada  | Wheat | 3-ADON  |
| A60601    | <i>F. graminearum s.s</i> | Canada  | Wheat | 3-ADON  |
| NS0602    | <i>F. graminearum s.s</i> | Canada  | Wheat | 3-ADON  |
| ON0639    | <i>F. graminearum s.s</i> | Canada  | Wheat | 3-ADON  |
| PEI0633   | <i>F. graminearum s.s</i> | Canada  | Wheat | 3-ADON  |
| MIN11     | <i>F. graminearum s.s</i> | Canada  | Wheat | 3-ADON  |
| NB0617    | <i>F. graminearum s.s</i> | Canada  | Wheat | 3-ADON  |
| S3BS0601  | <i>F. graminearum s.s</i> | Canada  | Wheat | 3-ADON  |
| DFFG120   | <i>F. graminearum s.s</i> | Canada  | Wheat | 3-ADON  |
| CHW52707  | <i>F. graminearum s.s</i> | China   | Wheat | 15-ADON |
| CHW52611  | <i>F. graminearum s.s</i> | China   | Wheat | 15-ADON |
| CHM4175   | <i>F. graminearum s.s</i> | China   | Wheat | 15-ADON |
| CHM4055   | <i>F. graminearum s.s</i> | China   | Wheat | 15-ADON |
| CHW52701  | <i>F. asiaticum</i>       | China   | Wheat | 15-ADON |
| CHW56708  | <i>F. graminearum s.s</i> | China   | Wheat | 15-ADON |
| CHW56707  | <i>F. graminearum s.s</i> | China   | Wheat | 15-ADON |
| CHM3034   | <i>F. graminearum s.s</i> | China   | Maize | 15-ADON |
| CHM1265   | <i>F. graminearum s.s</i> | China   | Maize | 15-ADON |
| CHW54601  | <i>F. asiaticum</i>       | China   | Wheat | 3-ADON  |
| CHW54603  | <i>F. asiaticum</i>       | China   | Wheat | 3-ADON  |
| CHW54611  | <i>F. asiaticum</i>       | China   | Wheat | 15-ADON |
| CH54604   | <i>F. asiaticum</i>       | China   | Wheat | NIV     |
| CHW54612  | <i>F. asiaticum</i>       | China   | Wheat | 15-ADON |
| CHW54602  | <i>F. asiaticum</i>       | China   | Wheat | 3-ADON  |
| CHW52516  | <i>F. asiaticum</i>       | China   | Wheat | NIV     |
| CHWM25011 | <i>F. meridionale</i>     | China   | Maize | NIV     |
| CHM15026  | <i>F. meridionale</i>     | China   | Maize | NIV     |
| CHW52517  | <i>F. asiaticum</i>       | China   | Wheat | NIV     |
| CHM5282   | <i>F. meridionale</i>     | China   | Maize | NIV     |
| CHM5292   | <i>F. meridionale</i>     | China   | Maize | NIV     |
| CHM25040  | <i>F. meridionale</i>     | China   | Maize | NIV     |
| CHM4048   | <i>F. meridionale</i>     | China   | Maize | NIV     |
| GFG175    | <i>F. graminearum s.s</i> | Germany | Wheat | 15-ADON |
| G4D16     | <i>F. graminearum s.s</i> | Germany | Wheat | 15-ADON |
| GFG170    | <i>F. graminearum s.s</i> | Germany | Wheat | 15-ADON |
| GFG164    | <i>F. graminearum s.s</i> | Germany | Wheat | 15-ADON |
| GFG40     | <i>F. graminearum s.s</i> | Germany | Wheat | 15-ADON |
| GFG9211   | <i>F. graminearum s.s</i> | Germany | Wheat | 15-ADON |
| GFG2311   | <i>F. graminearum s.s</i> | Germany | Wheat | 15-ADON |
| GFG164    | <i>F. graminearum s.s</i> | Germany | Wheat | 15-ADON |
| GFG168    | <i>F. graminearum s.s</i> | Germany | Wheat | 15-ADON |
| G9D29     | <i>F. graminearum s.s</i> | Germany | Wheat | 3-ADON  |
| GFG4      | <i>F. graminearum s.s</i> | Germany | Wheat | 3-ADON  |
| GFG5      | <i>F. graminearum s.s</i> | Germany | Wheat | 3-ADON  |
| GFG2      | <i>F. graminearum s.s</i> | Germany | Wheat | 3-ADON  |
| G12D30    | <i>F. graminearum s.s</i> | Germany | Wheat | 3-ADON  |
| GFG12     | <i>F. graminearum s.s</i> | Germany | Wheat | 3-ADON  |

|         |                           |         |        |         |
|---------|---------------------------|---------|--------|---------|
| G8D35   | <i>F. graminearum s.s</i> | Germany | Wheat  | 3-ADON  |
| G21D14  | <i>F. graminearum s.s</i> | Germany | Wheat  | NIV     |
| G21D6   | <i>F. graminearum s.s</i> | Germany | Wheat  | NIV     |
| GFG6    | <i>F. graminearum s.s</i> | Germany | Wheat  | NIV     |
| GFG1111 | <i>F. graminearum s.s</i> | Germany | Wheat  | NIV     |
| MEX001  | <i>F. boothii</i>         | Mexico  | Wheat  | 15-ADON |
| MEX002  | <i>F. boothii</i>         | Mexico  | Wheat  | 15-ADON |
| MEX003  | <i>F. boothii</i>         | Mexico  | Wheat  | 15-ADON |
| MEX004  | <i>F. boothii</i>         | Mexico  | Wheat  | 15-ADON |
| MEX005  | <i>F. boothii</i>         | Mexico  | Barley | 15-ADON |
| MEX006  | <i>F. boothii</i>         | Mexico  | Wheat  | 15-ADON |
| MEX007  | <i>F. boothii</i>         | Mexico  | Wheat  | 15-ADON |
| MEX008  | <i>F. boothii</i>         | Mexico  | Wheat  | 15-ADON |
| MEX009  | <i>F. boothii</i>         | Mexico  | Wheat  | 15-ADON |
| MEX011  | <i>F. boothii</i>         | Mexico  | Wheat  | 15-ADON |
| MEX012  | <i>F. boothii</i>         | Mexico  | Wheat  | 15-ADON |
| MEX013  | <i>F. boothii</i>         | Mexico  | Wheat  | 15-ADON |
| MEX014  | <i>F. boothii</i>         | Mexico  | Wheat  | 15-ADON |
| MEX015  | <i>F. boothii</i>         | Mexico  | Wheat  | 15-ADON |
| MEX016  | <i>F. boothii</i>         | Mexico  | Wheat  | 15-ADON |
| MEX017  | <i>F. boothii</i>         | Mexico  | Wheat  | 15-ADON |
| MEX019  | <i>F. boothii</i>         | Mexico  | Wheat  | 15-ADON |
| MEX010  | <i>F. meridionale</i>     | Mexico  | Wheat  | NIV     |
| PO001   | <i>F. graminearum s.s</i> | Poland  | Wheat  | 15-ADON |
| PO002   | <i>F. graminearum s.s</i> | Poland  | Wheat  | 15-ADON |
| PO004   | <i>F. graminearum s.s</i> | Poland  | Wheat  | 15-ADON |
| PO005   | <i>F. graminearum s.s</i> | Poland  | Wheat  | 15-ADON |
| PO008   | <i>F. graminearum s.s</i> | Poland  | Wheat  | 15-ADON |
| PO003   | <i>F. graminearum s.s</i> | Poland  | Wheat  | 3-ADON  |
| PO006   | <i>F. graminearum s.s</i> | Poland  | Wheat  | 3-ADON  |
| PO007   | <i>F. graminearum s.s</i> | Poland  | Wheat  | 3-ADON  |
| PO009   | <i>F. graminearum s.s</i> | Poland  | Wheat  | 3-ADON  |
| PO010   | <i>F. graminearum s.s</i> | Poland  | Wheat  | 3-ADON  |
| PO011   | <i>F. graminearum s.s</i> | Poland  | Wheat  | 3-ADON  |
| PO012   | <i>F. graminearum s.s</i> | Poland  | Wheat  | 3-ADON  |
| FC772   | <i>F. graminearum s.s</i> | UK      | Wheat  | 15-ADON |
| FC1878  | <i>F. graminearum s.s</i> | UK      | Wheat  | 15-ADON |
| FC1876  | <i>F. graminearum s.s</i> | UK      | Wheat  | 15-ADON |
| FC1874  | <i>F. graminearum s.s</i> | UK      | Wheat  | 15-ADON |
| FC1880  | <i>F. graminearum s.s</i> | UK      | Wheat  | 15-ADON |
| FC1835  | <i>F. graminearum s.s</i> | UK      | Wheat  | 15-ADON |
| FC778   | <i>F. graminearum s.s</i> | UK      | Wheat  | 3-ADON  |
| FC1792  | <i>F. graminearum s.s</i> | UK      | Wheat  | 3-ADON  |
| FC1068  | <i>F. graminearum s.s</i> | UK      | Wheat  | 3-ADON  |
| FC253   | <i>F. graminearum s.s</i> | UK      | Wheat  | 3-ADON  |
| FC1067  | <i>F. graminearum s.s</i> | UK      | Wheat  | 3-ADON  |
| FC989   | <i>F. graminearum s.s</i> | UK      | Wheat  | 3-ADON  |
| FC974   | <i>F. graminearum s.s</i> | UK      | Wheat  | 3-ADON  |
| FC1868  | <i>F. graminearum s.s</i> | UK      | Wheat  | 3-ADON  |
| FC1394  | <i>F. graminearum s.s</i> | UK      | Wheat  | 3-ADON  |
| FC1095  | <i>F. graminearum s.s</i> | UK      | Wheat  | 3-ADON  |

|               |                           |    |       |        |
|---------------|---------------------------|----|-------|--------|
| <b>FC1828</b> | <i>F. graminearum</i> s.s | UK | Wheat | 3-ADON |
| <b>FC1264</b> | <i>F. graminearum</i> s.s | UK | Wheat | 3-ADON |
| <b>FC1259</b> | <i>F. graminearum</i> s.s | UK | Wheat | 3-ADON |
| <b>FC1399</b> | <i>F. graminearum</i> s.s | UK | Wheat | 3-ADON |

**Table S2.** List of primers and sequences used to identify the chemotypes of *Fusarium graminearum* species complex strains.

| <b>Primer name</b> | <b>Gene</b>                    | <b>Sequence 5'-3'</b> | <b>Reference</b>        |
|--------------------|--------------------------------|-----------------------|-------------------------|
| 3CON               | <i>TRI3</i>                    | TGGCAAAGACTGGTTCAC    | Ward et al. [20]        |
| 3NA                | <i>TRI3</i>                    | GTGCACAGAATATACGAGC   | Ward et al. [20]        |
| 3D15A              | <i>TRI3</i>                    | ACTGACCCAAGCTGCCATC   | Ward et al. [20]        |
| 3D3A               | <i>TRI3</i>                    | CGCATTGGCTAACACATG    | Ward et al. [20]        |
| EF-1               | <i>EF-1<math>\alpha</math></i> | ATGGGTAAGGARGACAAGAC  | O'Donnell et al. [8,11] |
| EF-2               | <i>EF-1<math>\alpha</math></i> | GGARGTACCAGTSATCATGTT | O'Donnell et al. [8,11] |
